# Supplementary material for: In Vitro Cytotoxicity of Antiresorptive and Antiangiogenic Compounds on Oral Tissues Contributing to MRONJ: Systematic Review
Source: MDPI journal article supplement (doi:10.3390/biom13060973), 2023-06-10
Supplement: s1 [file s1]

Supplementary File 1

Table S1: Full OHAT Risk of Bias Analysis

| Ref | Was<br>administered<br>dose<br>exposure<br>level<br>adequately<br>randomised? | Was<br>allocation to<br>study<br>groups<br>adequately<br>concealed? | Were<br>experimental<br>conditions<br>identical<br>across study<br>groups? | Were<br>the<br>research<br>personnel and<br>human<br>subjects<br>blinded to the<br>study group<br>during the<br>study? | Were<br>the<br>outcome<br>data<br>complete<br>without<br>attrition or<br>exclusion<br>from<br>analysis? | Can we be<br>confident in the<br>exposure<br>characterization<br>? | Can we be<br>confident in<br>the outcome<br>assessment? | Were all<br>measured<br>outcomes<br>reported? | Were<br>statistical<br>methods<br>appropriate? | Did<br>researchers<br>adhere to the<br>study<br>protocol? |
|-----|-------------------------------------------------------------------------------|---------------------------------------------------------------------|----------------------------------------------------------------------------|------------------------------------------------------------------------------------------------------------------------|---------------------------------------------------------------------------------------------------------|--------------------------------------------------------------------|---------------------------------------------------------|-----------------------------------------------|------------------------------------------------|-----------------------------------------------------------|
| 12  | ++                                                                            | ++                                                                  | ++                                                                         | +                                                                                                                      | +                                                                                                       | +                                                                  | +                                                       | ++                                            | -                                              | +                                                         |
| 13  | ++                                                                            | ++                                                                  | +                                                                          | +                                                                                                                      | +                                                                                                       | +                                                                  | ++                                                      | +                                             | -                                              | +                                                         |
| 14  | ++                                                                            | ++                                                                  | ++                                                                         | +                                                                                                                      | +                                                                                                       | ++                                                                 | +                                                       | ++                                            | -                                              | +                                                         |
| 15  | ++                                                                            | ++                                                                  | +                                                                          | +                                                                                                                      | +                                                                                                       | -                                                                  | ++                                                      | ++                                            | ++                                             | +                                                         |
| 16  | ++                                                                            | ++                                                                  | ++                                                                         | +                                                                                                                      | +                                                                                                       | +                                                                  | +                                                       | ++                                            | -                                              | +                                                         |
| 17  | +                                                                             | +                                                                   | +                                                                          | +                                                                                                                      | +                                                                                                       | +                                                                  | ++                                                      | ++                                            | --                                             | +                                                         |
| 18  | ++                                                                            | ++                                                                  | ++                                                                         | +                                                                                                                      | +                                                                                                       | +                                                                  | ++                                                      | ++                                            | +                                              | +                                                         |
| 19  | ++                                                                            | +                                                                   | ++                                                                         | +                                                                                                                      | +                                                                                                       | +                                                                  | ++                                                      | ++                                            | ++                                             | +                                                         |
| 20  | ++                                                                            | ++                                                                  | ++                                                                         | +                                                                                                                      | +                                                                                                       | +                                                                  | ++                                                      | ++                                            | -                                              | +                                                         |
| 21  | ++                                                                            | ++                                                                  | ++                                                                         | +                                                                                                                      | +                                                                                                       | +                                                                  | +                                                       | +                                             | -                                              | +                                                         |

|    |    |    |    |    |   |    |    |    |    |    |
|----|----|----|----|----|---|----|----|----|----|----|
| 22 | ++ | ++ | ++ | +  | + | +  | -  | ++ | -  | +  |
| 23 | ++ | ++ | ++ | +  | + | +  | ++ | +  | -  | +  |
| 24 | ++ | ++ | +  | +  | + | +  | +  | +  | -  | +  |
| 25 | ++ | ++ | +  | +  | + | +  | ++ | +  | -  | +  |
| 26 | ++ | ++ | ++ | +  | + | +  | ++ | +  | ++ | +  |
| 27 | ++ | ++ | ++ | +  | + | +  | ++ | +  | -  | +  |
| 28 | ++ | ++ | ++ | ++ | + | +  | ++ | ++ | -  | +  |
| 29 | ++ | ++ | +  | +  | + | +  | ++ | +  | -  | +  |
| 30 | ++ | ++ | +  | ++ | + | +  | ++ | -  | -- | +  |
| 31 | ++ | ++ | ++ | ++ | + | +  | ++ | -  | -  | +  |
| 32 | ++ | ++ | +  | ++ | + | +  | ++ | +  | -  | +  |
| 33 | ++ | +  | ++ | +  | + | ++ | ++ | ++ | -  | +  |
| 34 | ++ | ++ | +  | ++ | + | +  | -  | ++ | ++ | +  |
| 35 | +  | +  | -  | -  | + | +  | +  | ++ | +  | ++ |
| 36 | ++ | ++ | ++ | ++ | + | +  | ++ | +  | +  | ++ |
| 37 | +  | ++ | ++ | +  | + | +  | ++ | ++ | +  | +  |

|    |    |    |    |    |   |   |    |    |    |    |
|----|----|----|----|----|---|---|----|----|----|----|
| 38 | +  | ++ | ++ | +  | + | + | ++ | ++ | +  | +  |
| 39 | ++ | ++ | +  | ++ | + | + | ++ | +  | +  | ++ |
| 40 | ++ | +  | +  | ++ | + | + | +  | +  | -  | -  |
| 41 | ++ | ++ | ++ | +  | + | + | ++ | +  | +  | +  |
| 42 | ++ | +  | ++ | +  | + | + | +  | -  | ++ | +  |
| 43 | ++ | +  | ++ | +  | + | - | +  | -  | ++ | +  |
| 44 | ++ | ++ | ++ | +  | + | + | +  | -  | ++ | +  |
| 45 | ++ | ++ | ++ | +  | + | + | ++ | -  | +  | +  |
| 46 | ++ | ++ | +  | +  | + | + | +  | +  | -  | +  |
| 47 | ++ | ++ | +  | +  | + | + | +  | -  | ++ | +  |
| 48 | ++ | ++ | +  | +  | + | + | ++ | +  | -  | +  |
| 49 | ++ | ++ | +  | +  | + | + | -  | +  | -  | +  |
| 50 | ++ | ++ | ++ | +  | + | + | +  | ++ | -  | +  |
| 51 | ++ | ++ | ++ | +  | + | + | +  | ++ | -  | +  |
| 52 | +  | ++ | ++ | ++ | + | + | +  | ++ | -- | -  |
| 53 | ++ | ++ | ++ | ++ | + | + | ++ | ++ | ++ | +  |

|    |    |    |    |    |   |    |    |    |    |   |
|----|----|----|----|----|---|----|----|----|----|---|
| 54 | +  | ++ | ++ | ++ | + | ++ | -  | ++ | ++ | + |
| 55 | ++ | ++ | -  | ++ | + | -  | ++ | +  | +  | + |
| 56 | +  | +  | ++ | +  | + | ++ | +  | ++ | -  | + |
| 57 | ++ | ++ | +  | +  | + | +  | ++ | +  | +  | + |
| 58 | ++ | ++ | +  | +  | + | +  | +  | +  | -  | + |
| 59 | ++ | ++ | +  | +  | + | +  | ++ | +  | -  | + |
| 60 | ++ | ++ | +  | +  | + | +  | +  | +  | -  | + |
| 61 | ++ | ++ | +  | +  | + | -- | ++ | +  | -  | + |
| 62 | ++ | ++ | +  | +  | + | -- | ++ | +  | -  | + |
| 63 | ++ | ++ | +  | +  | + | +  | +  | +  | -  | + |
| 64 | ++ | ++ | +  | +  | + | +  | +  | +  | -  | + |
| 65 | ++ | ++ | +  | +  | + | +  | -- | +  | -  | + |
| 66 | +  | +  | +  | ++ | + | -- | ++ | +  | -  | + |
| 67 | ++ | ++ | +  | +  | + | +  | +  | +  | -  | + |
| 68 | ++ | ++ | +  | +  | + | +  | +  | +  | -  | + |
| 69 | ++ | ++ | +  | +  | + | +  | +  | +  | -  | + |

70      ++            ++            +            +            +            --            ++            --            -            +

Abbreviations: Ref, reference number; ++, definitely low risk of bias; +, probably low risk of bias; -, probably high risk of bias; –, definitely high risk of bias.

**Table S2:** Frequency of assays used in extracted papers

| Domain tested                | Assay          | Frequency of use |
|------------------------------|----------------|------------------|
| Cell viability/proliferation | MTT            | 29               |
|                              | MTS            | 4                |
|                              | CCK-8          | 2                |
|                              | XTT            | 2                |
|                              | TB staining    | 3                |
|                              | WST-1          | 1                |
|                              | CellTiter Blue | 3                |
|                              | CellTiter Glo  | 1                |
|                              | PrestoBlue     | 1                |
|                              | AlamarBlue     | 1                |
|                              | LDH            | 1                |
|                              | DAPI staining  | 1                |
|                              | Toxilight      | 1                |
|                              | SRB            | 1                |

|                |                                 |    |
|----------------|---------------------------------|----|
|                | Calcein viability               | 1  |
|                | Rhodamine stain                 | 2  |
|                | Crystal violet staining         | 1  |
|                | CyQUANT                         | 1  |
|                | [3H]-thymidine                  | 1  |
|                | Unspecified proliferation assay | 4  |
|                | Unspecified toxicity assay      | 1  |
| Cell migration | Scratch/wound healing           | 18 |
|                | Boyden chamber                  | 6  |
|                | Ibidi culture insert assay      | 1  |
| Apoptosis      | Caspase-Glo 3/7                 | 3  |
|                | Caspase-3                       | 3  |
|                | Apo-one            homogeneous  | 2  |
|                | caspase 3/7 assay               |    |
|                | TUNEL                           | 7  |
|                | Annexin V/PI staining           | 9  |
|                | Comet                           | 1  |

|       |                          |    |
|-------|--------------------------|----|
| Other | ELISA                    | 14 |
|       | Western blot             | 10 |
|       | SDS-PAGE                 | 1  |
|       | HPLC                     | 1  |
|       | LSC                      | 1  |
|       | Von Kossa staining       | 1  |
|       | Alizarin red staining    | 1  |
|       | Amplex Red Peroxidase    | 1  |
|       | Bone nodule formation    | 1  |
|       | TEM cellular analysis    | 2  |
|       | Cell morphology analysis | 3  |
|       | IHC staining             | 2  |
|       | Flow cytometry           | 9  |
|       | ALP                      | 4  |
|       | BCA protein assay        | 3  |
|       | Smad-3 inhibition assay  | 1  |



|                                                      |   |
|------------------------------------------------------|---|
| Osteogenic differentiation                           | 1 |
| Immunofluorescence analysis                          | 1 |
| Senescence associated $\beta$ galactosidase staining | 1 |
| TRAP staining                                        | 1 |
| Resorption assay (Coomassie Brilliant Blue)          | 1 |
| Masson's trichrome staining                          | 1 |
| DCPMO                                                | 3 |
| Osteocalcin synthesis                                | 1 |
| Immunostaining and confocal microscopy               | 1 |

Abbreviations: MTT, (4,5-dimethylthiazol-2-yl)-2,5-diphenyl-2H-tetrazolium bromide assay; MTS, 3-(4,5-dimethylthiazol-2-yl)-5-(3-carboxymethoxyphenyl)-2-(4-sulfophenyl)-2H-tetrazolium assay; CCK-8, Cell counting kit-8; XTT, - 2,3-Bis-(2-Methoxy-4-Nitro-5-Sulfophenyl)-2H-Tetrazolium-5-Carboxanilide

Assay; TB, trypan blue; WST-1, Water Soluble Tetrazolium Salts-1; LDH, Lactase Dehydrogenase; DAPI, 4',6-diamidino-2-phenylindole; SRB, sulforhodamine B assay; TUNEL - Terminal deoxynucleotidyl transferase (TdT) dUTP Nick-End Labelling assay; Annexin V/PI staining, Annexin V/propidium iodide; ELISA, Enzyme-Linked Immunosorbent Assay; SDS-

PAGE, Sodium dodecyl-sulfate polyacrylamide gel electrophoresis; HPLC, High-performance liquid chromatography; LSC, Liquid Scintillation Counting; TEM, Transmission Electron Microscopy; IHC, Immunohistochemistry ; ALP, Alkaline phosphatase assay kit; BCA, Bicinchoninic acid; TRAP, Tartrate-resistant acid phosphatase; DCPMO, Direct Contrast-Phase Microscopic Observation.
